# Supplementary material for: KLB, encoding β‐Klotho, is mutated in patients with congenital hypogonadotropic hypogonadism
Source: PubMed Central journal article supplement (PMC5623842; doi:10.15252/emmm.201607376), 2017-07-28
Supplement: EMMM-9-1379-s002.pdf [file EMMM-9-1379-s002.pdf]

## Expanded View Figures

### Figure EV1. Putative pathogenic variants in *KLB* identified in congenital hypogonadotropic hypogonadism.

- A Identified *KLB* variants and conservation of affected *KLB* residues. Schematic of  $\beta$ -Klotho with identified mutations in CHH probands and amino acid conservation data on mouse, chicken, *Xenopus*, zebrafish, and human Klotho. GH1 denotes glycosyl hydrolase-1; TM denotes transmembrane domain. Gray dots indicate the known glycosylation sites.
- B Expression and maturation of WT and *KLB* mutants. Cell lysates were subjected to PNGase (P) or EndoH (E) digestion and then processed for *KLB* immunoblotting using anti-HA antibodies. Overall expression levels were determined by PNGase-treated bands. Receptor maturation levels were calculated by the fraction of the EndoH-resistant band (mature) out of the total *KLB* immunoreactivity of EndoH-treated samples, and mutants were compared to WT using unpaired *t*-test. Blots are cropped for the purpose of presentation and indicated by black line. The experiments were repeated three times and data were plotted as mean  $\pm$  SEM. U: untreated sample. \**P* < 0.05, \*\**P* < 0.01, \*\*\**P* < 0.001.

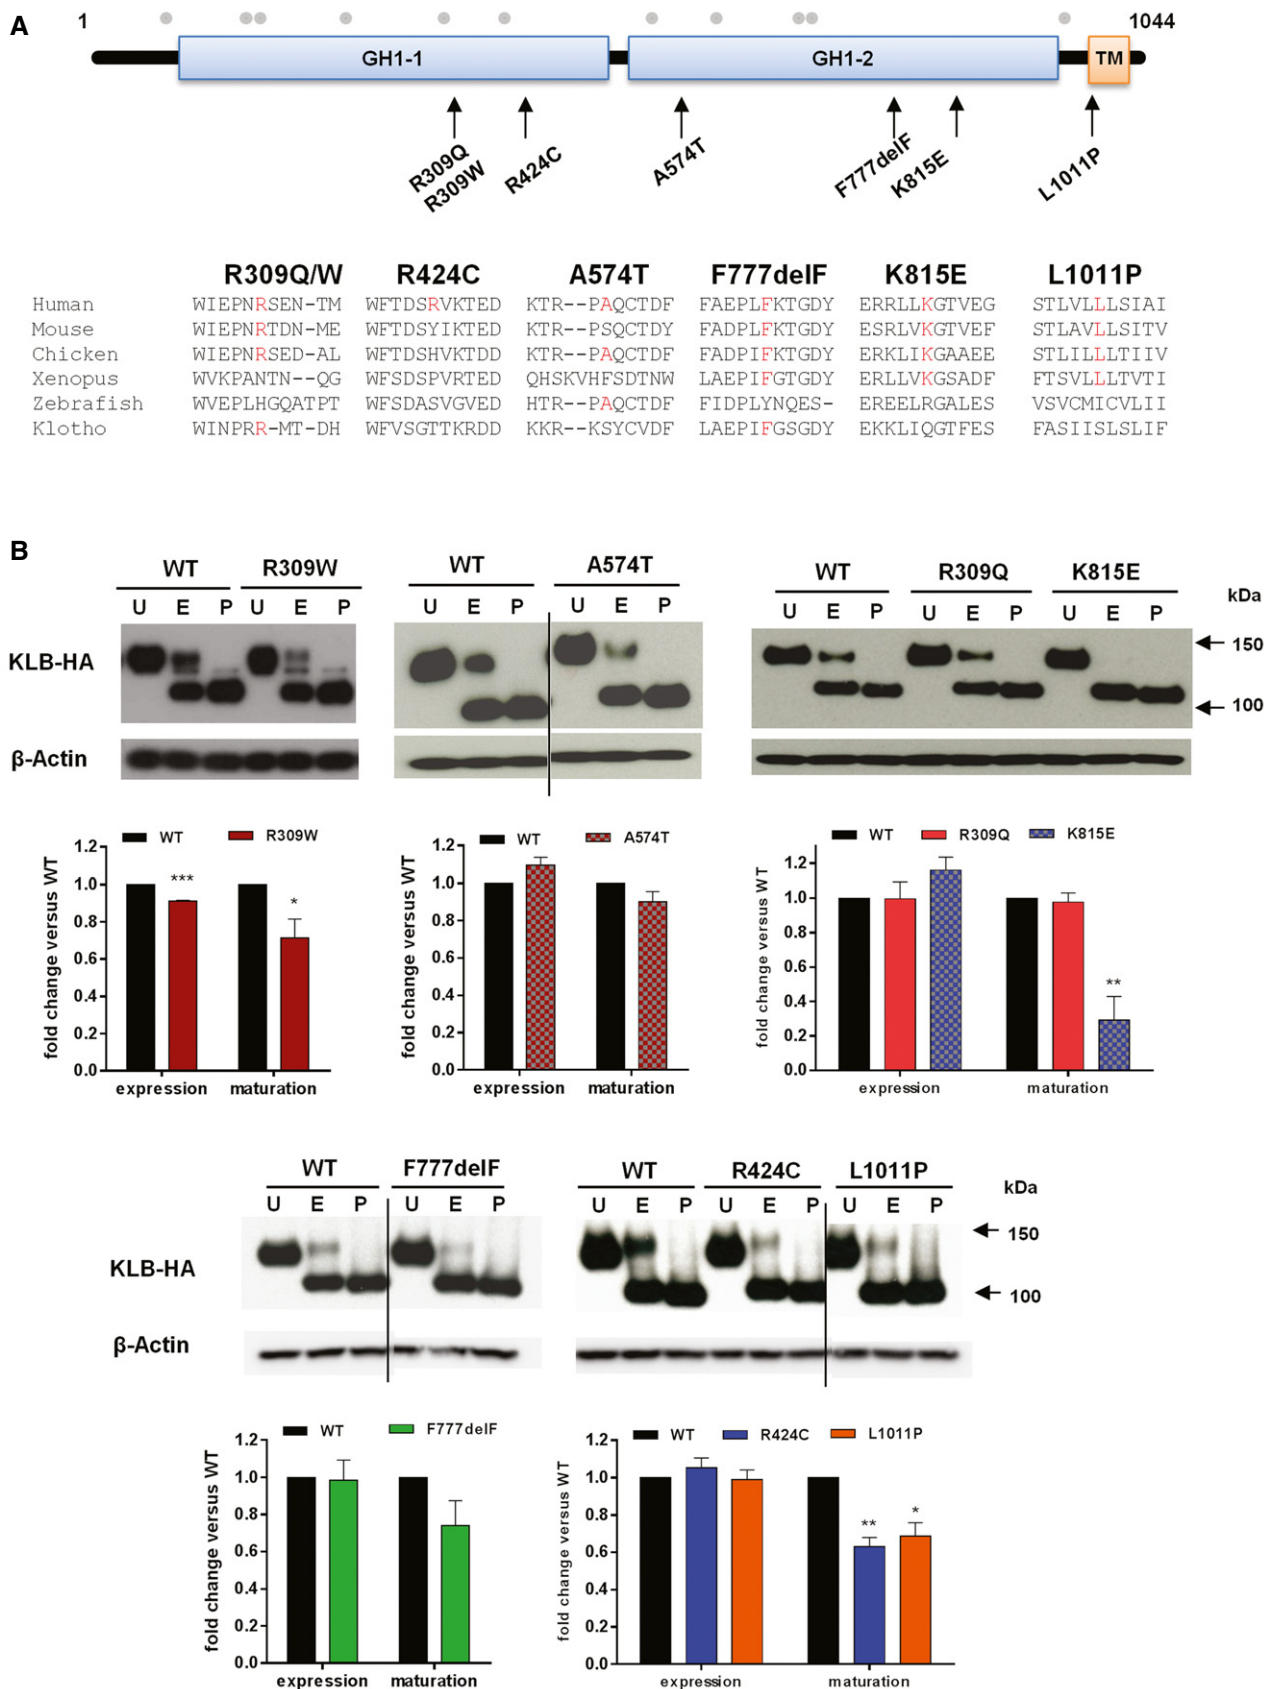

Figure EV1.

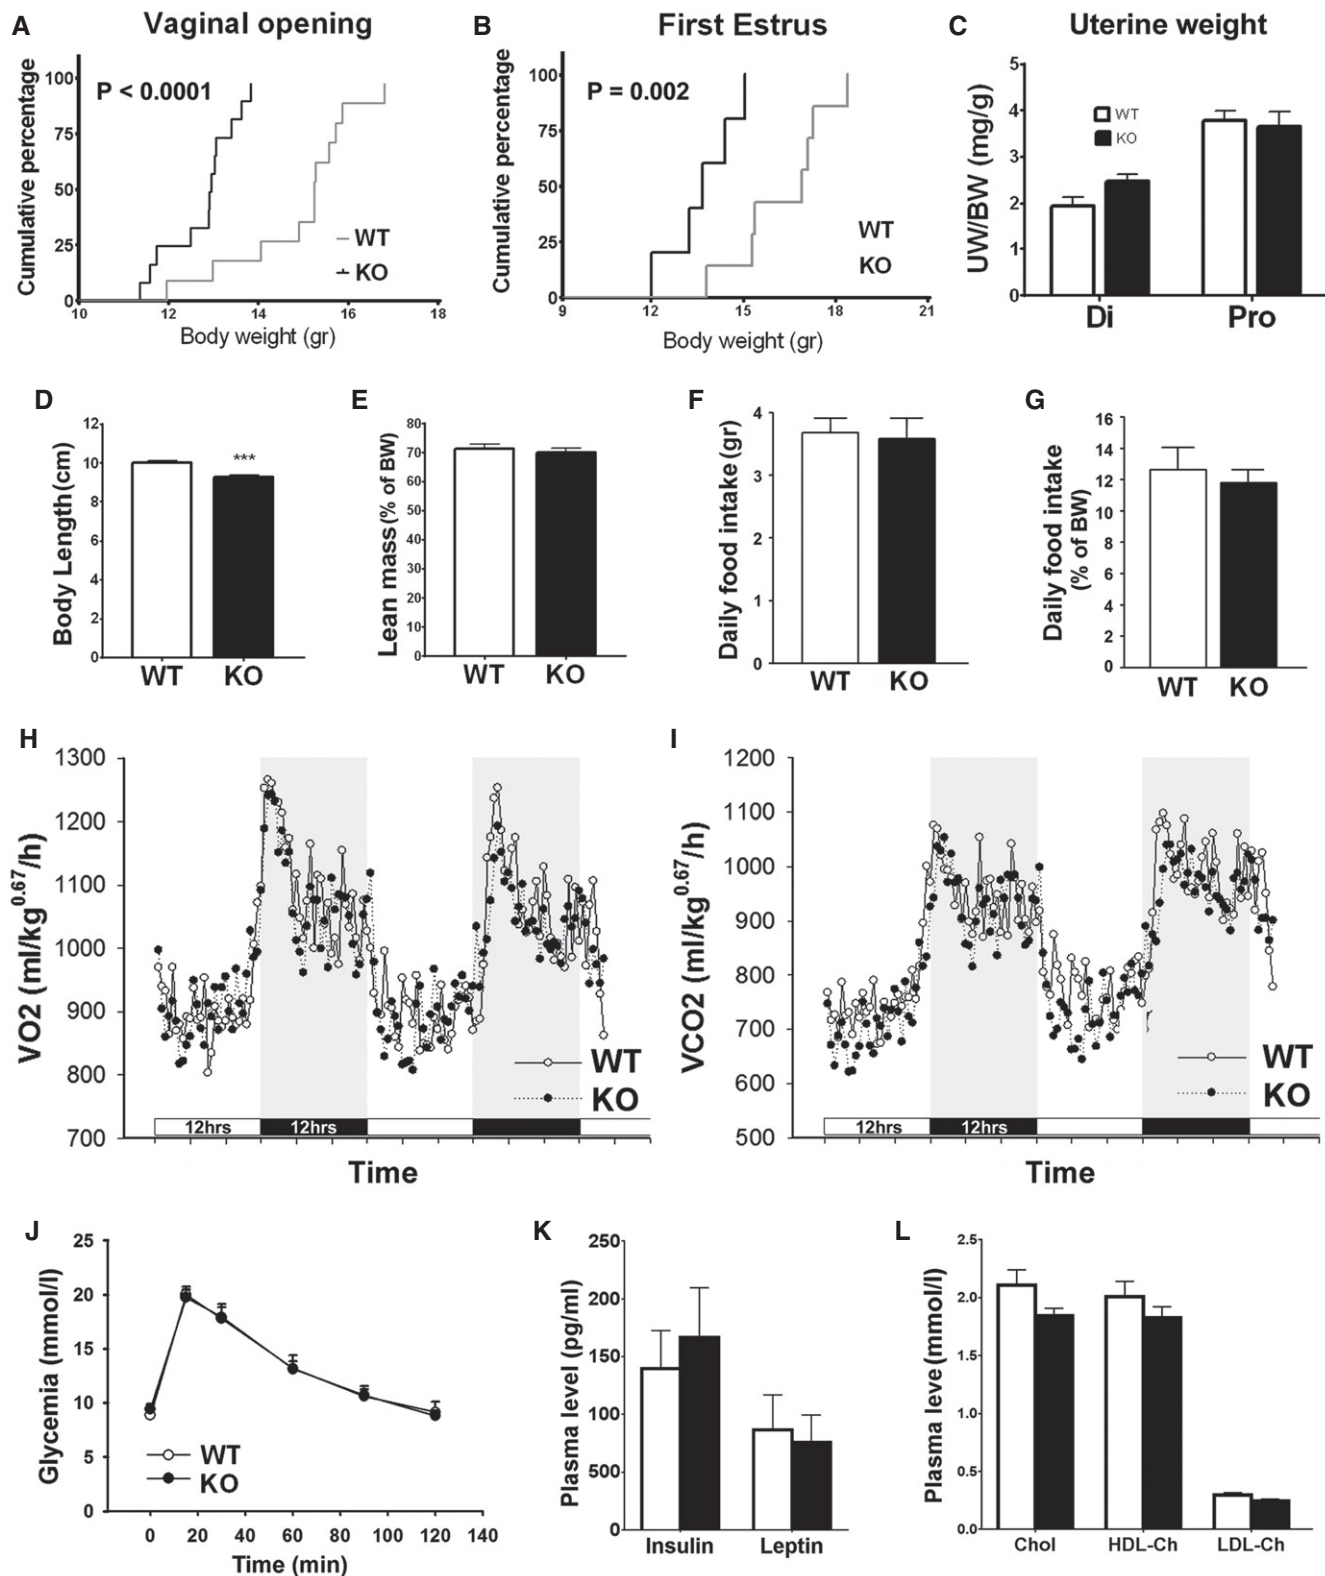

Figure EV2.

**Figure EV2. Extended reproductive and metabolic features in *Klb*KO mice.**

- A, B Cumulative percentage of vaginal opening (WT:  $n = 11$ ; KO:  $n = 12$ ) and first estrus (WT:  $n = 7$ ; KO:  $n = 5$ ) as a function of body weight, Gehan–Breslow–Wilcoxon test.
- C Normalized uterine weight expressed as the uterine/body weight ratio (mg/g) in the diestrus (Di WT:  $n = 6$ ; Di KO:  $n = 5$ ) and proestrus (Pro WT:  $n = 8$ ; Pro KO:  $n = 5$ ) phases of the estrous cycle, unpaired  $t$ -test.
- D Body length of adult wild-type *Klb*KO compared to littermates (WT:  $n = 15$ ; KO:  $n = 10$ ), unpaired  $t$ -test;  $***P < 0.001$ .
- E Lean mass expressed as a percentage of body weight of adult females (WT:  $n = 23$ ; KO:  $n = 20$ ), unpaired  $t$ -test.
- F, G Raw and normalized (percentage of body weight) daily food intake (WT:  $n = 10$ ; KO:  $n = 10$ ), unpaired  $t$ -test.
- H, I Energy expenditure evaluated using metabolic cages: measurement of oxygen consumption ( $\text{VO}_2$ ) and carbon dioxide production ( $\text{VCO}_2$ ) (WT:  $n = 10$ ; KO:  $n = 10$ ). Horizontal dark bars represent 12 h dark phase.
- J Glycemia during a glucose tolerance test (WT:  $n = 13$ ; KO:  $n = 11$ ), unpaired  $t$ -test.
- K, L Plasmatic levels of insulin, leptin (WT:  $n = 5$ ; KO:  $n = 4$ ), free, and bound cholesterol (WT:  $n = 8$ ; KO:  $n = 3$ ), unpaired  $t$ -test.
- Data information: Values shown are mean  $\pm$  SEM.

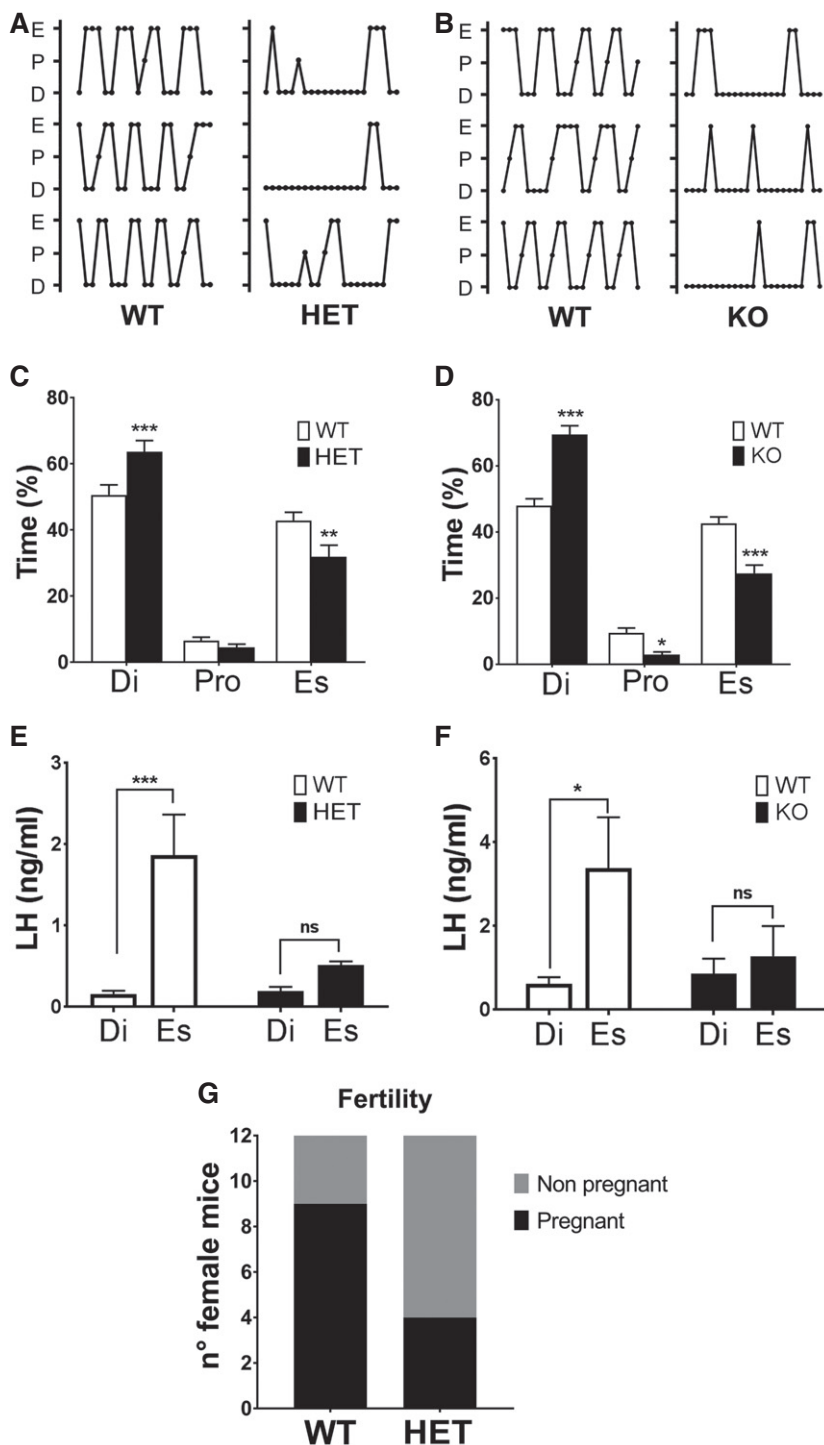

**Figure EV3. KlbHET mice exhibit altered estrous cycle and subfertility.**

A, B Comparison of representative estrous cycle patterns of 3- to 4-month-old WT vs. HET (A) and WT vs. KO (B) females, demonstrating marked alteration in both KlbHET and KlbKO.

C, D (C) Quantification of time spent in different estrous cycle phases in WT ( $n = 16$ ) vs. KlbHET ( $n = 16$ ) and (D) in WT ( $n = 17$ ) vs. KlbKO ( $n = 13$ ) adult females, unpaired t-test.

E, F Altered LH amplitude during the estrous cycle of KlbHET and KlbKO female mice. (E) Reduced LH levels during the estrous phase of KlbHET mice (HET Di:  $n = 6$ ; HET Es:  $n = 10$ ; WT Di:  $n = 8$ ; WT Es:  $n = 8$ ). Di: diestrus; Es: estrus; Pro: proestrus. (F) Reduces LH levels during the estrous phase of KlbKO mice (WT Di:  $n = 15$ ; WT Es:  $n = 16$ ; KO Di:  $n = 15$ ; KO Es:  $n = 14$ ). Data were analyzed by two-way ANOVA followed by Sidak's multiple comparisons test.

G Fertility evaluated as number of pregnant vs. non-pregnant in female KlbHET ( $n = 12$ ) and WT littermates ( $n = 12$ ) in a short-term mating protocol, chi-squared test.

Data information: Values shown are mean  $\pm$  SEM; \* $P < 0.05$ , \*\* $P < 0.01$ , \*\*\* $P < 0.001$ .

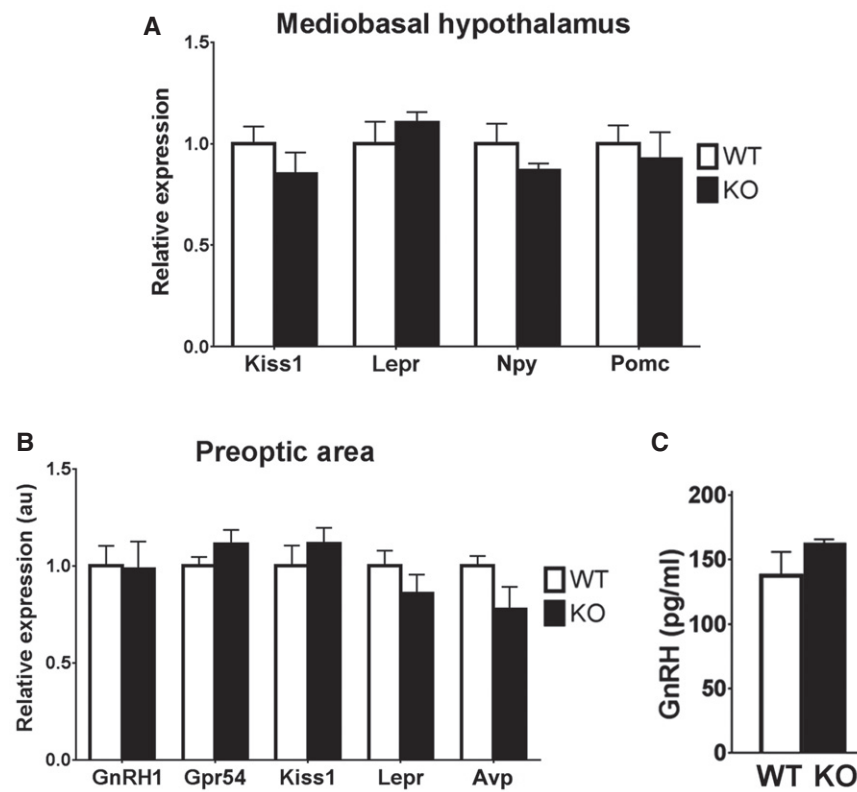

**Figure EV4. Loss of *Klb* in female mice does not impair the expression of key hypothalamic genes including GnRH.**

A, B Gene expression profiles on MBH and POA hypothalamic microdissection from *Klb*KO and WT adult brains ( $n = 5$  per group). Differences between groups were assessed using unpaired  $t$ -test. Values are shown as mean  $\pm$  SEM.

C Quantification of GnRH peptide content by ELISA in conditioned medium from median eminence explant cultures treated with 0.05 M KCl in order to induce the release of the entire GnRH vesicular pool (WT:  $n = 4$ ; KO:  $n = 4$ ). Values are shown as mean  $\pm$  SEM.

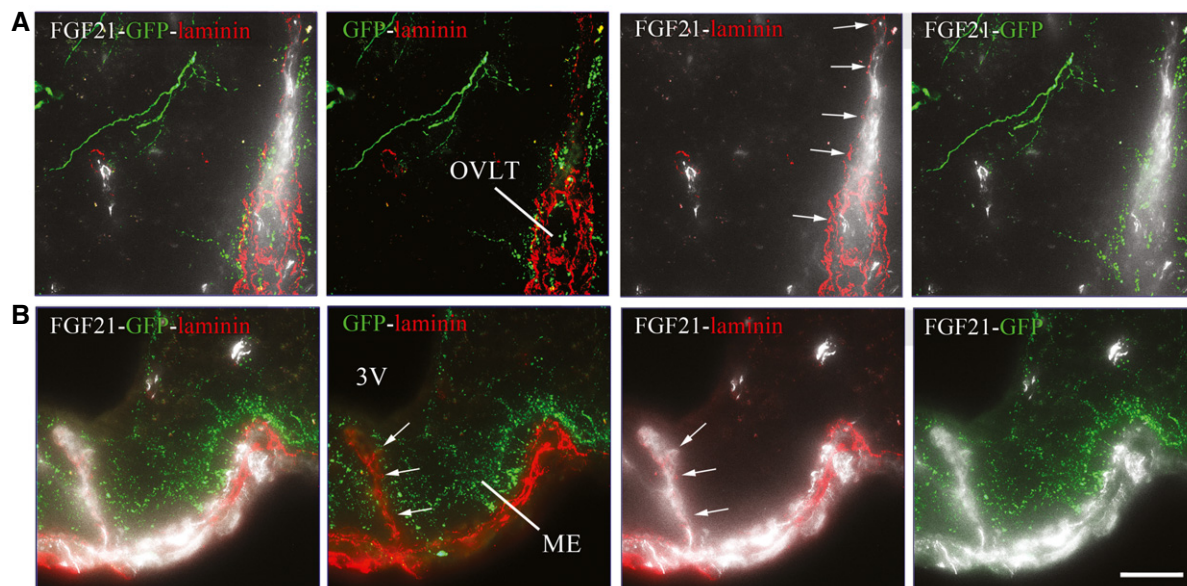

**Figure EV5. FGF21 access to GnRH neurons by fenestrated vessels.**

A Representative photomicrographs of the preoptic region showing GnRH neurons (GFP, green) and laminin immunoreactivity surrounding the blood vessels of the OVLT (arrows, red) labeled by fluorescent rFGF21 (5 nmol/animal, white staining). 3V, third ventricle; OVLT, organum vasculosum laminae terminalis.

B Representative photomicrographs showing laminin immunoreactivity surrounding the blood vessels of the ME (arrows, red) labeled by fluorescent rFGF21 (5 nmol/animal, white staining) in the tuberal region of the hypothalamus. Scale bar 40  $\mu$ m (for A and B).
