# Supplementary material for: KLB, encoding β‐Klotho, is mutated in patients with congenital hypogonadotropic hypogonadism
Source: PubMed Central journal article supplement (PMC5623842; doi:10.15252/emmm.201607376), 2017-07-28
Supplement: EMMM-9-1379-s003.pdf [file EMMM-9-1379-s003.pdf]

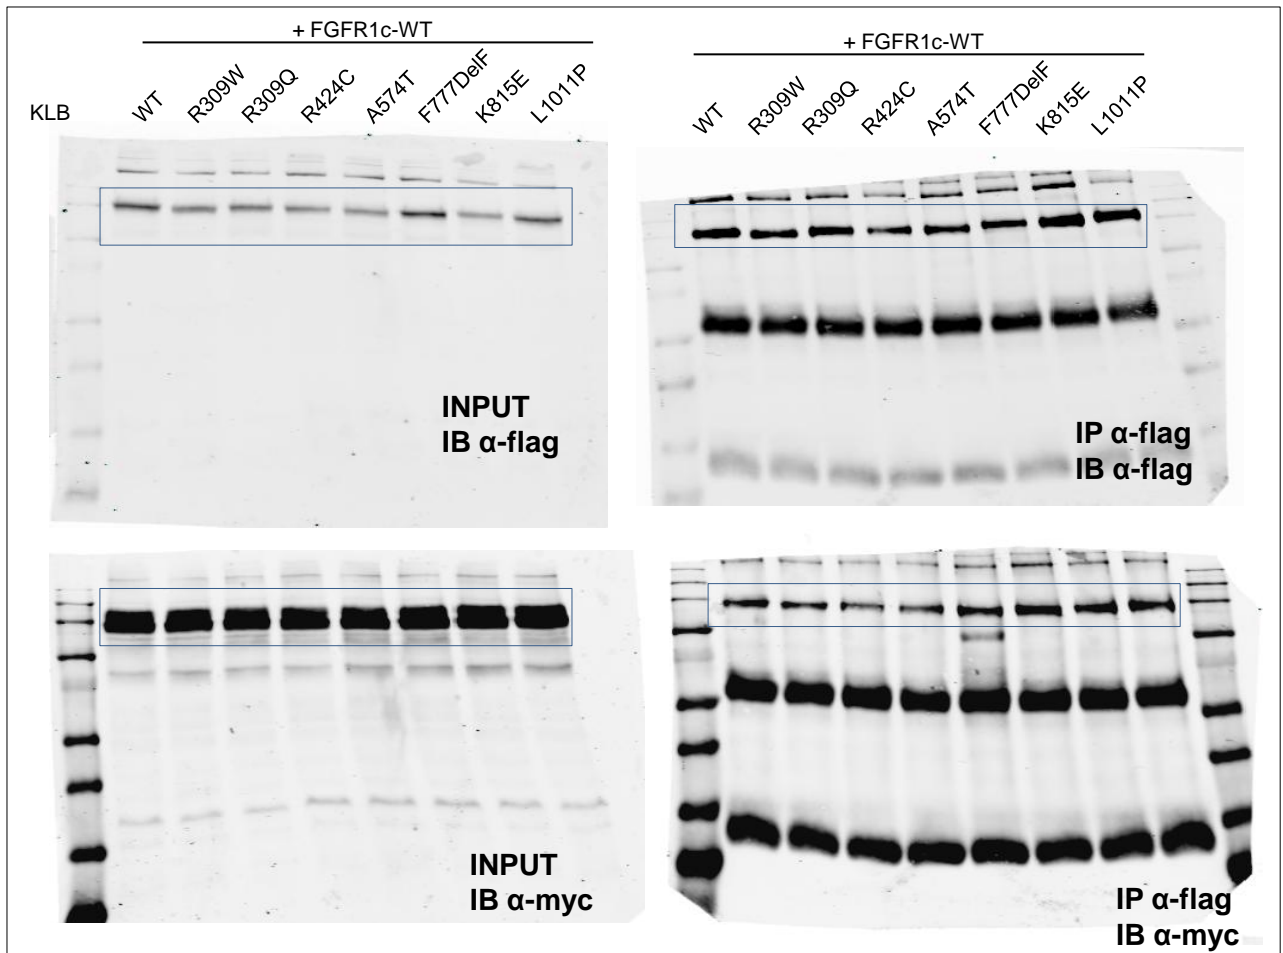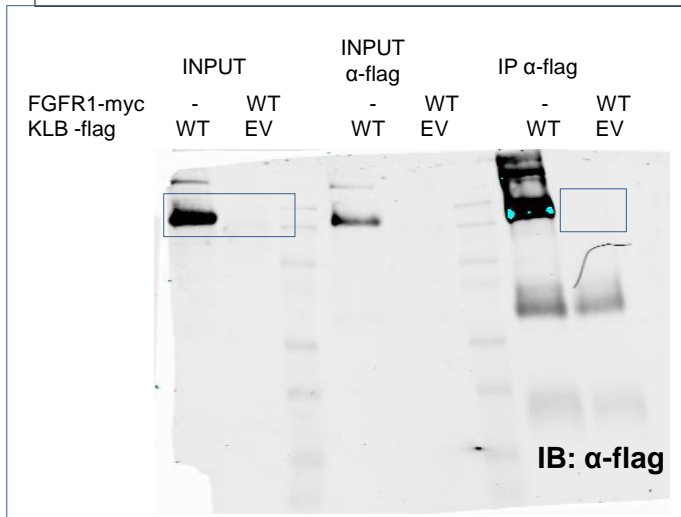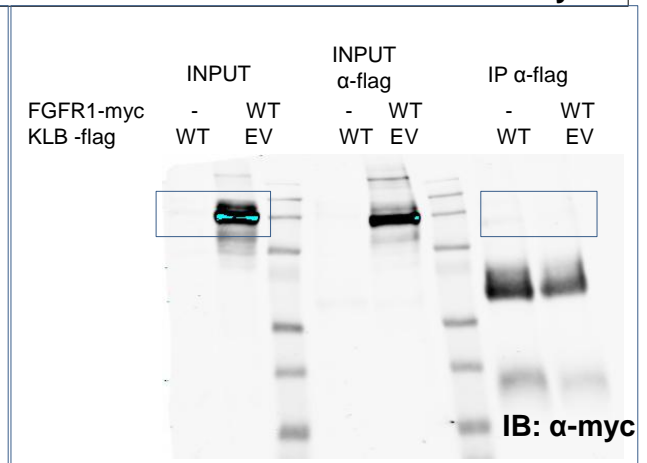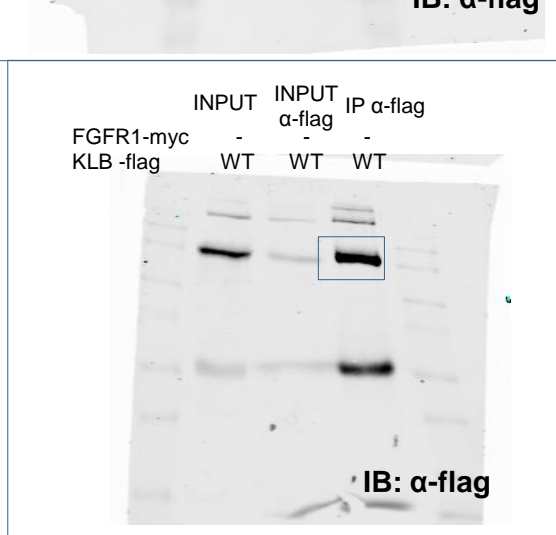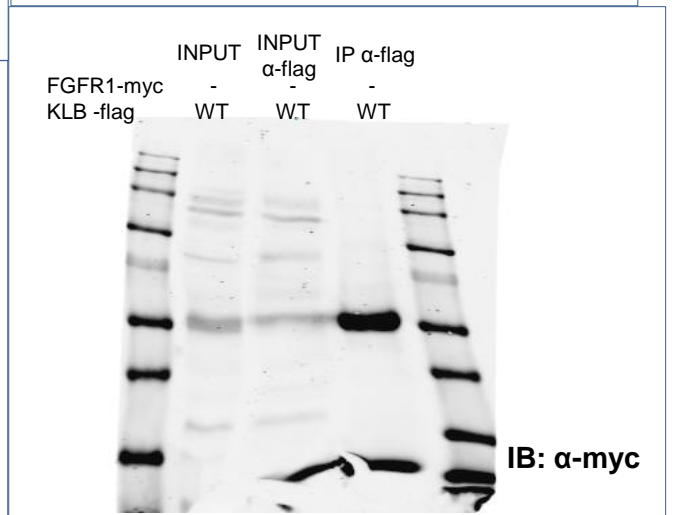

Odyssey system: saturated bands are shown in blue
